# Supplementary material
Source: PubMed Central journal article supplement (PMC8461990)
Supplement: NIHMS1740803-supplement-Supplemental_Materials.pdf [file NIHMS1740803-supplement-Supplemental_Materials.pdf]

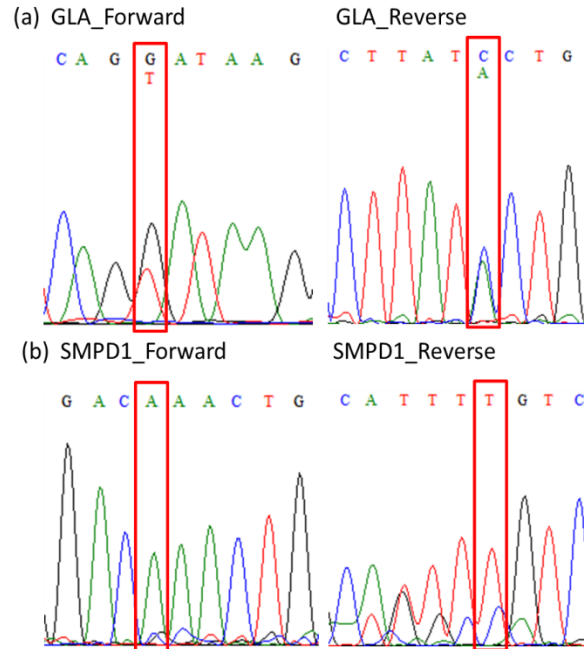

**Supplemental Figure S1. Electropherograms for variants in genes encoding GLA and SMPD1 in case 95RD414.** (a) Variant “X,100653420,C,A,95RD414” on gene *GLA* was heterozygous with signals of both reference allele (G) and alternative allele (T) on the forward strand. Sequencing of the reverse strand confirmed the heterozygous signals of both reference allele (C) and alternative allele (A). (b) Variant “11,6413175,C,A,95RD414” on the gene *SMPD1* was homozygous with the predominant signal of mutant allele (A) on the forward strand and predominant signal of mutant allele (T) on the reverse strand.

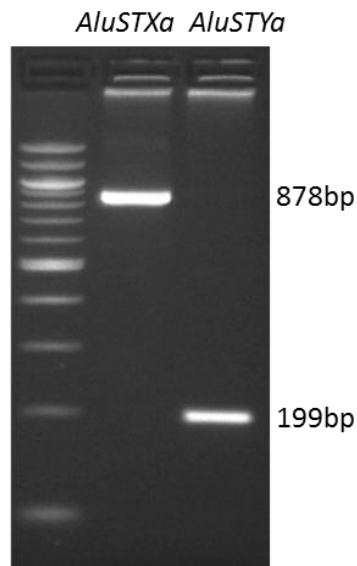

**Supplemental Figure S2. Gender determination for 95RD414.** The banding patterns indicate the patient is a female.

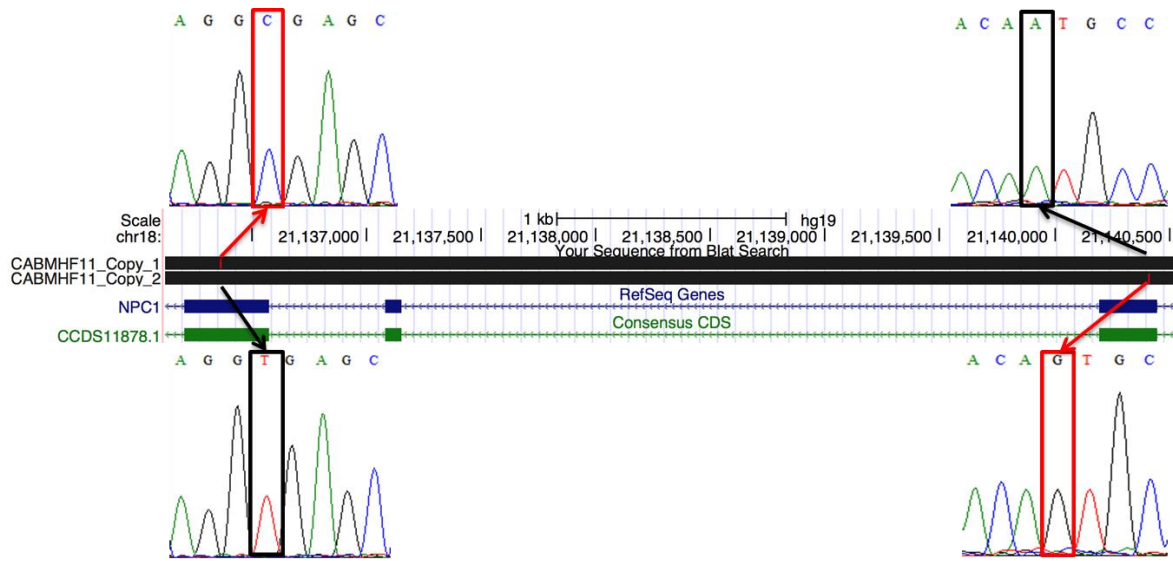

**Supplemental Figure S3. Compound Heterogeneity of variants in the gene encoding NPC1 in case CABMHF1.** Two copies of gene *NPC1* in case CABMHF11 are shown as the thick solid black track. Two mutants on different copies are marked in red bar. Red arrows lead to the electropherogram of the mutant allele (circled by red box) and its flanking sequence, while black arrows lead to the mutant-corresponding reference allele (circled by black box) and its flanking sequence. The RefSeq gene annotation for *NPC1* is shown in blue and the CCDS coding sequence annotation is shown in green. Exonic regions are shown as solid boxes, while non-exonic regions are shown as thin lines, with arrows indicating the direction of the gene.

**Table S1. LSD candidate genes.**

|         |          |       |          |         |          |           |          |         |
|---------|----------|-------|----------|---------|----------|-----------|----------|---------|
| A1BG    | AEBP1    | AP2B1 | ARFRP1   | ASAP1   | ATP6V0E1 | BLOC1S5   | CAV2     | CFH     |
| A2M     | AFF4     | AP2M1 | ARGLU1   | ASAP2   | ATP6V0E2 | BLOC1S6   | CAV3     | CFHR4   |
| AAGAB   | AFM      | AP2S1 | ARHGAP12 | ASAP3   | ATP6V1A  | BLVRB     | CBL      | CFTR    |
| AAK1    | AFMID    | AP3B1 | ARHGAP27 | ASGR1   | ATP6V1B1 | BMP1      | CBLB     | CHAF1A  |
| AATF    | AGA      | AP3B2 | ARHGAP33 | ASGR2   | ATP6V1B2 | BNIP1     | CBLC     | CHCHD10 |
| ABCA1   | AGAP1    | AP3D1 | ARHGDI1A | ASIC4   | ATP6V1C1 | BORCS5    | CBR3     | CHI3L1  |
| ABCA2   | AGAP2    | AP3M1 | ARL1     | ASNA1   | ATP6V1C2 | BORCS6    | CC2D1B   | CHIA    |
| ABCA3   | AGFG1    | AP3M2 | ARL10    | ASNS    | ATP6V1D  | BPTF      | CCDC109B | CHID1   |
| ABCA5   | AGPAT5   | AP3S1 | ARL11    | ASPH    | ATP6V1E1 | BRI3      | CCDC122  | CHIT1   |
| ABCA6   | AGTRAP   | AP3S2 | ARL13A   | ASPN    | ATP6V1E2 | BSG       | CCDC22   | CHM     |
| ABCA7   | AHCY     | AP4B1 | ARL13B   | ASXL2   | ATP6V1F  | BST1      | CCDC53   | CHML    |
| ABCB6   | AHCYL2   | AP4E1 | ARL14    | ATF4    | ATP6V1G1 | BST2      | CCDC93   | CHMP1A  |
| ABCB9   | AHNAK    | AP4M1 | ARL14EP  | ATG10   | ATP6V1G2 | BTD       | CCNT1    | CHMP1B  |
| ABCC10  | AHSG     | AP4S1 | ARL14EPL | ATG12   | ATP6V1G3 | C10orf54  | CCR5     | CHMP2A  |
| ABCC2   | AKR1A1   | AP5B1 | ARL15    | ATG13   | ATP6V1H  | C12orf49  | CCZ1     | CHMP2B  |
| ABCD4   | AKR1B10  | AP5M1 | ARL16    | ATG14   | ATP7B    | C12orf66  | CCZ1B    | CHMP3   |
| ABHD17B | AKR1C1   | AP5S1 | ARL17A   | ATG16L1 | ATP8A1   | C16orf62  | CD163    | CHMP4A  |
| ABHD5   | AKT1S1   | AP5Z1 | ARL17B   | ATG16L2 | ATP8B1   | C18orf8   | CD164    | CHMP4B  |
| ABL1    | ALDH18A1 | APC2  | ARL2     | ATG2A   | ATP9A    | C19orf24  | CD177    | CHMP4C  |
| ABL2    | ALDH3A2  | APCS  | ARL2BP   | ATG2B   | ATP9B    | C19orf47  | CD180    | CHMP5   |
| ACAD11  | ALDOA    | APEH  | ARL3     | ATG3    | ATPIF1   | C1GALT1   | CD1B     | CHMP6   |
| ACAN    | ALG1     | APEX1 | ARL4A    | ATG4A   | ATRAID   | C1GALT1C1 | CD1D     | CHPT1   |
| ACAP1   | ALPI     | APH1A | ARL4C    | ATG4B   | ATRN     | C1orf43   | CD1E     | CHST15  |
| ACAP2   | ALPP     | APLP2 | ARL4D    | ATG4C   | ATXN2    | C1QB      | CD207    | CISD2   |
| ACAP3   | ALS2     | APOA1 | ARL5A    | ATG4D   | AXL      | C1QTNF5   | CD22     | CLCN1   |
| ACE     | AMBRA1   | APOA5 | ARL5B    | ATG5    | AZU1     | C1R       | CD2AP    | CLCN2   |
| ACOT9   | AMDHD2   | APOB  | ARL5C    | ATG7    | B4GALT5  | C1S       | CD302    | CLCN3   |
| ACP1    | AMOT     | APOC3 | ARL6     | ATG9A   | BACE2    | C2orf72   | CD36     | CLCN4   |
| ACP2    | AMPH     | APOC4 | ARL6IP1  | ATG9B   | BAIAP2L1 | C3        | CD37     | CLCN5   |
| ACP5    | AMY2B    | APOD  | ARL6IP4  | ATHL1   | BAIAP2L2 | C3orf58   | CD4      | CLCN6   |
| ACPP    | ANG      | APOE  | ARL6IP5  | ATP11A  | BAK1     | C4B       | CD59     | CLCN7   |
| ACSF2   | ANGPT1   | APOF  | ARL6IP6  | ATP11C  | BAX      | C5        | CD5L     | CLCNKA  |

|          |         |         |         |          |         |                |         |         |
|----------|---------|---------|---------|----------|---------|----------------|---------|---------|
| ACSF3    | ANKFY1  | APP     | ARL8A   | ATP13A2  | BCAP31  | C5AR1          | CD63    | CLCNKB  |
| ACSS1    | ANKRD12 | APPL1   | ARL8B   | ATP2A1   | BCAS1   | C6orf136       | CD68    | CLEC11A |
| ADA      | ANO1    | AQP8    | ARL9    | ATP5A1   | BCAT2   | C6orf58        | CD74    | CLEC4F  |
| ADAM28   | ANPEP   | ARAP1   | ARMCX1  | ATP5C1   | BCHE    | C7orf55-LUC7L2 | CDC42   | CLEC4G  |
| ADAM8    | ANXA5   | ARAP2   | ARMCX3  | ATP5F1   | BCL10   | C9             | CDH1    | CLIC1   |
| ADAMDEC1 | ANXA7   | ARAP3   | ARMCX6  | ATP5I    | BCR     | C9orf116       | CDH13   | CLINT1  |
| ADAMTSL2 | AOAH    | ARF1    | ARMS2   | ATP5J2   | BDH2    | C9orf72        | CDH3    | CLN3    |
| ADAP1    | AP1AR   | ARF3    | ARPC5   | ATP5O    | BECN1   | C9orf91        | CDK4    | CLN5    |
| ADAR     | AP1B1   | ARF4    | ARRB1   | ATP6AP1  | BGN     | CA2            | CDK7    | CLN6    |
| ADCY5    | AP1G1   | ARF5    | ARRB2   | ATP6AP1L | BHLHE40 | CA6            | CDS2    | CLN8    |
| ADD1     | AP1G2   | ARF6    | ARSA    | ATP6AP2  | BHMT    | CACFD1         | CEACAM1 | CLTA    |
| ADIPOQ   | AP1M1   | ARFGAP1 | ARSB    | ATP6V0A1 | BIN1    | CALR           | CEACAM3 | CLTB    |
| ADRA2A   | AP1M2   | ARFGAP2 | ARSD    | ATP6V0A2 | BIRC6   | CALU           | CELA1   | CLTC    |
| ADRB1    | AP1S1   | ARFGAP3 | ARSG    | ATP6V0A4 | BLK     | CAMP           | CELSR3  | CLTCL1  |
| ADRB2    | AP1S2   | ARFGEF1 | ARSK    | ATP6V0B  | BLOC1S1 | CANT1          | CES1    | CLU     |
| ADRB3    | AP1S3   | ARFGEF2 | ART5    | ATP6V0C  | BLOC1S2 | CARNS1         | CES2    | CMA1    |
| ADRBK1   | AP2A1   | ARFIP1  | ASAH1   | ATP6V0D1 | BLOC1S3 | CAT            | CETN2   | CMPK2   |
| ADRBK2   | AP2A2   | ARFIP2  | ASAH2   | ATP6V0D2 | BLOC1S4 | CAV1           | CFB     | CNP     |
| COCH     | CSF1R   | DAG1    | DRAM1   | EPG5     | FCGRT   | GABARAPL2      | GNAT2   | HAAO    |
| COL11A1  | CSMD1   | DAGLB   | DRAM2   | EPHX1    | FCN1    | GALC           | GNB1    | HABP2   |
| COL11A2  | CSN3    | DAP     | DSC3    | EPN1     | FCN2    | GALNS          | GNB2    | HADHA   |
| COL18A1  | CSNK2A1 | DAPK1   | DSCR3   | EPN2     | FDX1L   | GALNT10        | GNB3    | HAPLN1  |
| COL1A1   | CSNK2B  | DAPK2   | DST     | EPN3     | FETUB   | GALNT2         | GNB4    | HAPLN4  |
| COL1A2   | CSRP1   | DAPK3   | DTNBP1  | EPRS     | FGD1    | GALNT5         | GNE     | HCK     |
| COL2A1   | CSRP3   | DCD     | DUSP1   | EPS15    | FGD2    | GALNT6         | GNPDA1  | HCLS1   |
| COL3A1   | CST3    | DCN     | DUSP10  | EPS15L1  | FGD4    | GAS6           | GNPTAB  | HDAC4   |
| COL5A1   | CST4    | DCTN1   | DUSP27  | EPX      | FGFR2   | GATA2          | GNPTG   | HDAC5   |
| COL5A2   | CST6    | DCTN4   | DUSP3   | ERAP1    | FGFR3   | GATAD2B        | GNS     | HDAC6   |
| COL6A1   | CST7    | DDR2    | DVL2    | ERAP2    | FGFR4   | GATM           | GOLGA4  | HEPH    |
| COL7A1   | CSTA    | DDX3X   | DYM     | ERBB2    | FGG     | GBA            | GOLGA5  | HERC1   |
| COL8A1   | CSTB    | DECR2   | DYNC1H1 | ERBB3    | FGL1    | GBAS           | GOLGB1  | HEXA    |
| COLEC11  | CTBS    | DEFA5   | DYRK1B  | ERBB4    | FHL1    | GBE1           | GOLIM4  | HEXB    |
| COMMD1   | CTDSP1  | DEPDC1  | ECE1    | ERLIN1   | FIG4    | GBF1           | GOLM1   | HFE     |

|         |          |          |        |         |         |        |         |           |
|---------|----------|----------|--------|---------|---------|--------|---------|-----------|
| COMMD10 | CTDSPL   | DEPDC5   | ECM1   | ERP27   | FIS1    | GDAP2  | GPD2    | HGS       |
| COMMD2  | CTNS     | DEPTOR   | EDEM2  | ERP29   | FKBP10  | GDF3   | GPLD1   | HGSNAT    |
| COMMD3  | CTSA     | DGAT2L6  | EDNRB  | ERRFI1  | FKBP14  | GEM    | GPNMB   | HHIPL1    |
| COMMD4  | CTSB     | DHDDS    | EEA1   | ESD     | FKBP15  | GET4   | GPR137  | HIF1A     |
| COMMD5  | CTSC     | DHPS     | EEF1A1 | ETFDH   | FKBP7   | GGA1   | GPR137B | HIP1      |
| COMMD6  | CTSD     | DHRS2    | EEF2   | F10     | FLCN    | GGA2   | GPR155  | HIP1R     |
| COMMD7  | CTSE     | DHX35    | EFHD2  | F12     | FLNC    | GGA3   | GPX1    | HIST1H1D  |
| COMMD8  | CTSF     | DIP2B    | EGF    | F2R     | FLOT1   | GGH    | GPX5    | HK1       |
| COMMD9  | CTSG     | DIRC2    | EGFR   | FAAH    | FLOT2   | GHR    | GPX6    | HK2       |
| COMP    | CTSH     | DKK3     | EHD1   | FAF1    | FLT1    | GIF    | GRHPR   | HLA-A     |
| COMTD1  | CTSK     | DLL1     | EHD2   | FAHD1   | FMN2    | GIGYF2 | GRK1    | HLA-B     |
| COPS7A  | CTSO     | DLX2     | EHD3   | FAM118B | FMOD    | GIMAP1 | GRK4    | HLA-C     |
| COQ4    | CTSS     | DMBT1    | EHD4   | FAM132B | FMR1    | GIMAP5 | GRK5    | HLA-DMA   |
| COQ6    | CTSV     | DMXL2    | EHHADH | FAM134A | FN1     | GIT1   | GRK6    | HLA-DMB   |
| COX4I2  | CTSW     | DNAJB12  | EI24   | FAM20A  | FNBP1   | GIT2   | GRK7    | HLA-DOA   |
| CP      | CTSZ     | DNAJC11  | EIF3A  | FAM20C  | FNIP2   | GKN1   | GRN     | HLA-DOB   |
| CPA2    | CTTN     | DNAJC13  | EIF3B  | FAM214B | FOLR1   | GLA    | GRSF1   | HLA-DQA1  |
| CPA3    | CUBN     | DNAJC15  | EIF3K  | FAM21C  | FOXO1   | GLB1   | GSAP    | HLA-DRA   |
| CPA5    | CUTA     | DNAJC16  | EIF4B  | FAM3A   | FOXO1   | GLB1L  | GSDMA   | HLA-DRB5  |
| CPB2    | CUX1     | DNAJC5   | EIF4E  | FAM3C   | FOXO3   | GLCE   | GSN     | HLA-E     |
| CPD     | CXCL12   | DNAJC6   | EIF4G1 | FAM45A  | FOXO4   | GLG1   | GSTM1   | HLA-F     |
| CPM     | CXCR1    | DNAJC8   | EIF5A2 | FAM50A  | FOXO6   | GLMP   | GSTO1   | HLA-G     |
| CPN1    | CXCR2    | DNASE1   | ELANE  | FAN1    | FOXRED2 | GLS    | GSTT1   | HMOX1     |
| CPNE2   | CXCR4    | DNASE1L1 | ENDOD1 | FAP     | FRRS1   | GLT8D1 | GTF2A1  | HNF4A     |
| CPNE5   | CYB561A3 | DNASE1L3 | ENPEP  | FASN    | FSD1L   | GLTPD2 | GTF2H1  | HNRNPA1   |
| CPQ     | CYB5A    | DNASE2   | ENPP1  | FASTKD3 | FTH1    | GM2A   | GUF1    | HNRNPA2B1 |
| CPS1    | CYB5R1   | DNM1     | ENPP2  | FBLN1   | FTL     | GMNN   | GUK1    | HNRNPA3   |
| CPVL    | CYBB     | DNM1L    | ENPP3  | FBLN2   | FUCA1   | GMPR   | GUSB    | HNRNPD    |
| CR1     | CYP2C18  | DNM2     | ENPP4  | FBN1    | FUCA2   | GMPR2  | GXYLT1  | HNRNPH2   |
| CR2     | CYP2C9   | DNM3     | ENPP5  | FBXL2   | FUNDC1  | GNA11  | GYS2    | HOXB7     |
| CREG1   | CYP2D6   | DOC2A    | ENTPD4 | FBXO6   | FUNDC2  | GNA13  | GZMA    | HOXC13    |
| CRIM1   | CYP4A22  | DOLK     | ENTPD6 | FBXO7   | FUS     | GNA14  | GZMB    | HP        |
| CRIP2   | CYTH2    | DPP4     | ENTPD8 | FCER1G  | FYCO1   | GNAI1  | GZMK    | HPS1      |

|          |        |          |         |         |         |         |         |         |
|----------|--------|----------|---------|---------|---------|---------|---------|---------|
| CRP      | D2HGDH | DPP7     | EPB41L5 | FCGBP   | GAA     | GNAI3   | GZMM    | HPS3    |
| CSAD     | DAB2   | DPY19L2  | EPDR1   | FCGR3A  | GABARAP | GNAQ    | H2AFZ   | HPS4    |
| HPS5     | INHBB  | KIAA1161 | LNPEP   | MASP1   | MRPL27  | NAGLU   | NSMCE2  | PARK7   |
| HPS6     | INHBE  | KIAA1324 | LONP1   | MAX     | MRPL30  | NAGPA   | NT5DC2  | PARP14  |
| HPSE     | INPP1  | KIAA1715 | LPCAT2  | MBD5    | MRPS15  | NAPA    | NT5E    | PARVG   |
| HPX      | INPP4A | KIAA1919 | LPIN2   | MCAM    | MRPS18C | NAPG    | NTHL1   | PBLD    |
| HRAS     | INPP4B | KIF16B   | LPL     | MCM2    | MRPS2   | NAPSA   | NTRK1   | PBXIP1  |
| HRG      | INPP5A | KIT      | LPO     | MCOLN1  | MRPS25  | NARF    | NUDCD3  | PCDHB14 |
| HS2ST1   | INPP5B | KLF15    | LRBA    | MCOLN2  | MRRF    | NBR1    | NUDT13  | PCDHGA2 |
| HSDL1    | INPP5D | KLHL12   | LRG1    | MCOLN3  | MRS2    | NCEH1   | NUMB    | PCOLCE  |
| HSP90AA1 | INPP5E | KLHL9    | LRIG1   | MDM2    | MS4A1   | NCF2    | NUMBL   | PCSK5   |
| HSPA13   | INPP5F | KLK1     | LRP1    | ME2     | MSR1    | NCF4    | NXPE2   | PCSK9   |
| HSPA1A   | INPP5J | KNG1     | LRP1B   | MED26   | MT3     | NCK2    | OAS2    | PCYOX1  |
| HSPA1B   | INPP5K | KRT18    | LRP2    | MED28   | MTCH1   | NCSTN   | OCRL    | PDCD6IP |
| HSPA1L   | INPPL1 | KRT8     | LRP3    | MEGF9   | MTDH    | NDFIP1  | OGDH    | PDE6C   |
| HSPA2    | INSIG1 | KXD1     | LRP5L   | MET     | MTHFD1L | NDFIP2  | OGDHL   | PDGFB   |
| HSPA5    | IQSEC1 | LACTB2   | LRP6    | MFGE8   | MTHFD2  | NDRG1   | OLFML1  | PDGFRA  |
| HSPA6    | IQSEC2 | LAMP1    | LRP8    | MFSD1   | MTHFR   | NDST1   | OLFML2B | PDGFRB  |
| HSPA8    | IQSEC3 | LAMP2    | LRPAP1  | MFSD11  | MTM1    | NDUFA9  | OLR1    | PDIA2   |
| HSPBAP1  | IRGM   | LAMP3    | LRRK2   | MFSD12  | MTMR1   | NECAP1  | OMD     | PK3     |
| HTR2B    | ITCH   | LAMTOR1  | LSS     | MFSD5   | MTMR10  | NECAP2  | OMG     | PDLIM7  |
| HTRA1    | ITFG1  | LAMTOR2  | LUC7L3  | MFSD7   | MTMR11  | NEDD4   | OPLAH   | PDP2    |
| HYAL1    | ITFG2  | LAMTOR3  | LUM     | MFSD8   | MTMR12  | NEDD4L  | OPTN    | PEA15   |
| HYAL2    | ITGA8  | LAMTOR4  | LXN     | MGAM    | MTMR14  | NEFH    | ORAI1   | PEAR1   |
| HYAL3    | ITGAL  | LAMTOR5  | LY6E    | MGARP   | MTMR2   | NEFL    | OSBP    | PEBP1   |
| IAH1     | ITGB2  | LAPTM4A  | LY86    | MGAT1   | MTMR3   | NES     | OSBP2   | PEBP4   |
| IDS      | ITGB5  | LAPTM4B  | LY96    | MGAT3   | MTMR4   | NEU1    | OSBPL10 | PER3    |
| IDUA     | ITIH1  | LAPTM5   | LYPD8   | MGAT4B  | MTMR6   | NEU3    | OSBPL11 | PES1    |
| IFI30    | ITIH3  | LATS2    | LYPLA2  | MGP     | MTMR7   | NEU4    | OSBPL1A | PEX11G  |
| IFITM1   | ITIH4  | LBP      | LYST    | MGST1   | MTMR8   | NEURL2  | OSBPL2  | PEX3    |
| IFNGR1   | ITM2B  | LCAT     | LYZ     | MICALCL | MTMR9   | NGFRAP1 | OSBPL3  | PFKFB2  |
| IFT27    | ITM2C  | LCN2     | LZTS2   | MICU2   | MTOR    | NGLY1   | OSBPL5  | PGBD5   |
| IGF1R    | ITSN1  | LCN8     | M6PR    | MINPP1  | MTSS1   | NHLRC3  | OSBPL6  | PGLYRP2 |

|         |          |          |           |         |          |          |         |         |
|---------|----------|----------|-----------|---------|----------|----------|---------|---------|
| IGF2R   | ITSN2    | LDHC     | MAFF      | MIOS    | MVB12A   | NHSL2    | OSBPL7  | PGRMC1  |
| IGFALS  | JAK1     | LDLR     | MAN2A1    | MITF    | MVB12B   | NIPA2    | OSBPL8  | PHB     |
| IGFBP1  | JARID2   | LDLRAP1  | MAN2A2    | MLPH    | MVP      | NIPSNAP1 | OSBPL9  | PHB2    |
| IGFBP3  | JCHAIN   | LEPROT   | MAN2B1    | MLST8   | MYADM    | NIT1     | OSGEP   | PHF20L1 |
| IGFBP5  | KANSL1L  | LEPROTL1 | MAN2B2    | MLX     | MYBPC2   | NKX2-1   | OSTM1   | PHKG2   |
| IGFBP6  | KCNAB2   | LGALS3BP | MAN2C1    | MMP14   | MYH1     | NMT2     | OXCT1   | PI4K2A  |
| IGFBP7  | KCNE1    | LGALS9B  | MANBA     | MMP2    | MYH11    | NOA1     | P2RX4   | PI4K2B  |
| IHH     | KCNE2    | LGMN     | MAP1A     | MMP8    | MYH2     | NOL8     | P4HB    | PI4KA   |
| IL16    | KCNK6    | LIFR     | MAP1LC3A  | MMP9    | MYLPF    | NOP14    | PA2G4   | PI4KB   |
| IL2RA   | KCTD12   | LIN37    | MAP1LC3B  | MMS19   | MYO1C    | NOS3     | PABPC4L | PIAS4   |
| IL2RB   | KCTD7    | LIN52    | MAP1LC3B2 | MON1A   | MYO3A    | NPC1     | PACS2   | PICALM  |
| IL2RG   | KDELC1   | LIPA     | MAP1LC3C  | MON1B   | MYO5A    | NPC2     | PACSIN3 | PIGR    |
| IL4I1   | KDELC2   | LIPC     | MAP3K13   | MPEG1   | MYO5B    | NPRL2    | PAH     | PIK3C2A |
| IL4R    | KDR      | LIPT1    | MAPK1     | MPO     | MYO6     | NPTN     | PAM     | PIK3C2B |
| IL6R    | KEAP1    | LITAF    | MAPK3     | MRAS    | MYO7A    | NRBF2    | PARD3   | PIK3C2G |
| IL6ST   | KERA     | LMAN1    | MAPK8IP3  | MRC1    | NAAA     | NRCAM    | PARD6A  | PIK3C3  |
| ILF3    | KIAA0196 | LMAN2    | MAPT      | MREG    | NAALADL2 | NRXN1    | PARD6B  | PIK3CA  |
| ILVBL   | KIAA0513 | LMBRD1   | MARCH2    | MRFAP1  | NAGA     | NSD1     | PARD6G  | PIK3CB  |
| IMPAD1  | KIAA1033 | LMTK2    | MARCO     | MROH6   | NAGK     | NSF      | PARK2   | PIK3CD  |
| PIK3CG  | PLSCR3   | PSEN2    | RAB32     | RAC1    | RNF167   | SCAMP3   | SIGMAR1 | SLC38A2 |
| PIK3R1  | PLTP     | PSENN    | RAB33A    | RAD23A  | RNF185   | SCARB1   | SIL1    | SLC38A7 |
| PIK3R2  | PM20D2   | PSTPIP1  | RAB33B    | RAD9A   | RNF41    | SCARB2   | SIRT1   | SLC38A9 |
| PIKFYVE | PMPCA    | PTBP1    | RAB34     | RAMP2   | RNH1     | SCARF1   | SIRT2   | SLC39A1 |
| PIM2    | PNLIPRP1 | PTEN     | RAB35     | RAMP3   | RPH3A    | SCO2     | SKAP2   | SLC39A3 |
| PINK1   | POFUT1   | PTGDS    | RAB36     | RANGRF  | RPL13    | SCP2     | SLC11A1 | SLC39A8 |
| PIP     | POFUT2   | PTH1R    | RAB37     | RAP2B   | RPL23    | SCPEP1   | SLC11A2 | SLC40A1 |
| PIP4K2A | POGLUT1  | PTP4A3   | RAB38     | RARRES1 | RPL3     | SDC2     | SLC12A3 | SLC44A2 |
| PIP4K2B | POLQ     | PTPDC1   | RAB39A    | RASEF   | RPL5     | SDCBP    | SLC12A4 | SLC46A1 |
| PIP4K2C | POLR3C   | PTPRB    | RAB39B    | RASGRF2 | RPL6     | SDF4     | SLC12A6 | SLC46A3 |
| PIP5K1A | PON1     | PTPRF    | RAB3A     | RASGRP3 | RPL7     | SDHC     | SLC12A9 | SLC48A1 |
| PIP5K1B | PON2     | PTPRZ1   | RAB3B     | RB1CC1  | RPL7A    | SEBOX    | SLC15A3 | SLC4A2  |
| PIP5K1C | POR      | PTTG1IP  | RAB3C     | RBL2    | RPL8     | SEC14L3  | SLC15A4 | SLC6A17 |
| PIPSL   | POSTN    | PUSL1    | RAB3D     | RBM15   | RPLP1    | SEC14L4  | SLC16A6 | SLC7A5  |

|         |          |           |          |        |         |           |          |         |
|---------|----------|-----------|----------|--------|---------|-----------|----------|---------|
| PITPNA  | PPA1     | PYCR2     | RAB3GAP2 | RBM19  | RPN1    | SEH1L     | SLC17A5  | SLC8B1  |
| PITPNB  | PPARGC1A | PYGM      | RAB3IL1  | RBM39  | RPN2    | SEMA3A    | SLC20A1  | SLCO1B3 |
| PITPNC1 | PPCDC    | PZP       | RAB3IP   | RBP1   | RPS17   | SEMA3G    | SLC22A8  | SLCO2B1 |
| PITPNM1 | PPCS     | QSOX1     | RAB40A   | RBSN   | RPS23   | SEMA4B    | SLC22A9  | SLPI    |
| PITPNM3 | PPP1R18  | RAB10     | RAB40AL  | RC3H2  | RPS25   | SERINC1   | SLC25A13 | SMAP1   |
| PKLR    | PPP1R3B  | RAB11A    | RAB40B   | RCBTB1 | RPS26   | SERINC2   | SLC25A16 | SMAP2   |
| PKM     | PPP2R3C  | RAB11B    | RAB40C   | RCBTB2 | RPS27   | SERPINA1  | SLC25A24 | SMCR8   |
| PKN1    | PPT1     | RAB11FIP1 | RAB41    | RDH14  | RPS28   | SERPINA11 | SLC25A26 | SMN1    |
| PLA2G15 | PPT2     | RAB11FIP2 | RAB42    | RDH16  | RPS3    | SERPINA3  | SLC25A28 | SMNDC1  |
| PLA2G2A | PQLC2    | RAB11FIP3 | RAB43    | RECQL5 | RPS3A   | SERPINA4  | SLC25A3  | SMPD1   |
| PLA2G6  | PRCP     | RAB11FIP4 | RAB44    | REG4   | RPS4X   | SERPINA5  | SLC25A30 | SMPDL3A |
| PLA2G7  | PRDX1    | RAB11FIP5 | RAB4A    | RELB   | RPS4Y2  | SERPINA6  | SLC25A32 | SMPDL3B |
| PLAC8   | PRDX6    | RAB12     | RAB4B    | RELN   | RPS6    | SERPINB11 | SLC25A33 | SMURF1  |
| PLAU    | PRELID1  | RAB13     | RAB5A    | REN    | RPS6KA3 | SERPINB8  | SLC25A35 | SMURF2  |
| PLBD1   | PRF1     | RAB14     | RAB5B    | RET    | RPTN    | SERPINE1  | SLC25A36 | SNAP25  |
| PLBD2   | PRG2     | RAB15     | RAB5C    | RFESD  | RPTOR   | SERPINE2  | SLC25A37 | SNAP29  |
| PLCB1   | PRKAA1   | RAB17     | RAB6A    | RGS19  | RPUSD4  | SERPINF1  | SLC25A38 | SNAP91  |
| PLCG1   | PRKAB1   | RAB18     | RAB6B    | RHEBL1 | RRAGA   | SERPINF2  | SLC25A4  | SNAPIN  |
| PLCG2   | PRKAG1   | RAB19     | RAB6C    | RHOB   | RRAGB   | SERPING1  | SLC25A51 | SNCA    |
| PLCL2   | PRKAG2   | RAB1A     | RAB7A    | RHOG   | RRAGC   | SERPINI2  | SLC26A11 | SNF8    |
| PLD1    | PRKCI    | RAB1B     | RAB8A    | RILP   | RRAGD   | SETX      | SLC29A3  | SNRPA   |
| PLD2    | PRKCZ    | RAB20     | RAB8B    | RILPL1 | RRAS    | SFTPD     | SLC2A13  | SNRPC   |
| PLD3    | PRL      | RAB21     | RAB9A    | RILPL2 | RRAS2   | SFXN3     | SLC2A6   | SNX1    |
| PLD4    | PRLR     | RAB22A    | RAB9B    | RIMS1  | RSAD2   | SGIP1     | SLC2A8   | SNX10   |
| PLEKHA8 | PRMT3    | RAB23     | RABAC1   | RIMS2  | RUBCN   | SGOL1     | SLC30A2  | SNX11   |
| PLEKHM1 | PROS1    | RAB24     | RABEP1   | RIN1   | RUFY1   | SGSH      | SLC30A4  | SNX12   |
| PLEKHO2 | PRPH     | RAB25     | RABEP2   | RIN2   | RUFY3   | SH3GL1    | SLC31A1  | SNX13   |
| PLIN2   | PRSS1    | RAB26     | RABEPK   | RIN3   | RUNX2   | SH3GL2    | SLC31A2  | SNX14   |
| PLOD1   | PRSS16   | RAB27A    | RABGAP1  | RNASE2 | RYR2    | SH3GL3    | SLC33A1  | SNX15   |
| PLOD2   | PRTN3    | RAB27B    | RABGAP1L | RNASE3 | S100A6  | SH3GLB1   | SLC34A1  | SNX16   |
| PLOD3   | PSAP     | RAB28     | RABGEF1  | RNASE4 | SACM1L  | SH3GLB2   | SLC35A4  | SNX17   |
| PLP1    | PSD      | RAB29     | RABIF    | RNASE6 | SAE1    | SH3KBP1   | SLC35A5  | SNX18   |
| PLP2    | PSD2     | RAB2A     | RABL2A   | RNASEK | SAMD10  | SH3TC2    | SLC35F6  | SNX19   |



|         |            |         |          |          |         |        |         |       |
|---------|------------|---------|----------|----------|---------|--------|---------|-------|
| PLS3    | PSD3       | RAB2B   | RABL2B   | RNASET2  | SBF1    | SHMT1  | SLC36A1 | SNX2  |
| PLSCR1  | PSD4       | RAB30   | RABL3    | RNF13    | SBF2    | SIAE   | SLC37A2 | SNX20 |
| PLSCR2  | PSEN1      | RAB31   | RABL6    | RNF146   | SCAMP2  | SIDT2  | SLC37A3 | SNX21 |
| SNX22   | ST3GAL1    | SULT1C2 | THBS4    | TNFAIP3  | UBE2Q1  | VPS35  | ZNF512  |       |
| SNX24   | ST3GAL3    | SULT2A1 | THNSL1   | TNNC1    | UBE4B   | VPS36  | ZNF57   |       |
| SNX25   | ST6GAL1    | SUMF1   | TIMM13   | TNPO2    | UBL3    | VPS37A | ZNF706  |       |
| SNX27   | ST6GALNAC2 | SUMF2   | TIMP2    | TNR      | UBQLN2  | VPS37B | ZNF789  |       |
| SNX29   | ST8SIA2    | SUPT16H | TKTL1    | TNXB     | UCP2    | VPS37C | ZNF84   |       |
| SNX3    | ST8SIA3    | SUPT20H | TLDC1    | TOLLIP   | UGDH    | VPS37D | ZNRF1   |       |
| SNX30   | STAB1      | SUPV3L1 | TLR2     | TOM1     | UGP2    | VPS39  | ZNRF2   |       |
| SNX31   | STAB2      | SUV39H1 | TLR3     | TOMM40   | UGT2B10 | VPS41  |         |       |
| SNX32   | STAM       | SVIL    | TLR7     | TOP3B    | UHRF2   | VPS45  |         |       |
| SNX33   | STAM2      | SYNGR1  | TLR9     | TOR3A    | ULK1    | VPS4A  |         |       |
| SNX4    | STAMBP     | SYNGR2  | TM7SF3   | TP53INP1 | ULK2    | VPS4B  |         |       |
| SNX5    | STARD10    | SYNJ1   | TM9SF1   | TPCN1    | ULK3    | VPS8   |         |       |
| SNX6    | STARD3     | SYNJ2   | TM9SF2   | TPCN2    | UNC93B1 | VSIG4  |         |       |
| SNX7    | STARD3NL   | SYNRG   | TM9SF4   | TPP1     | UPP1    | VTA1   |         |       |
| SNX8    | STEAP3     | SYP     | TMBIM1   | TPP2     | UQCRC1  | VTI1B  |         |       |
| SNX9    | STK10      | SYPL1   | TMC6     | TPRA1    | UQCRC2  | VTN    |         |       |
| SOCS5   | STK11      | SYPL2   | TMED10   | TPRG1L   | UROC1   | VWA5A  |         |       |
| SOD1    | STK11IP    | SYT1    | TMED7    | TPSAB1   | UROD    | VWF    |         |       |
| SOD3    | STK17B     | SYT10   | TMED9    | TPST1    | USP10   | WASL   |         |       |
| SORD    | STOM       | SYTL2   | TMEM104  | TRAF6    | USP16   | WBP2   |         |       |
| SORL1   | STON1      | SZT2    | TMEM106A | TRAPPC2L | USP2    | WDR11  |         |       |
| SOST    | STON2      | TACC2   | TMEM106B | TRIM13   | USP32   | WDR24  |         |       |
| SPACA3  | STS        | TAF6L   | TMEM127  | TRIM14   | USP8    | WDR26  |         |       |
| SPARC   | STX10      | TAGLN2  | TMEM135  | TRIM23   | UTP18   | WDR41  |         |       |
| SPARCL1 | STX11      | TAGLN3  | TMEM141  | TRIM25   | UVRAG   | WDR45  |         |       |
| SPATA18 | STX12      | TARDBP  | TMEM144  | TRIM63   | VAC14   | WDR45B |         |       |
| SPATS2L | STX16      | TBC1D1  | TMEM175  | TRIM7    | VAMP2   | WDR48  |         |       |
| SPG11   | STX17      | TBK1    | TMEM176B | TRIP6    | VAMP3   | WDR59  |         |       |
| SPG20   | STX18      | TCEAL1  | TMEM179B | TRPM7    | VAMP4   | WDR6   |         |       |
| SPG21   | STX19      | TCEAL8  | TMEM192  | TSG101   | VAMP7   | WDR81  |         |       |

|        |         |          |           |        |        |          |  |  |
|--------|---------|----------|-----------|--------|--------|----------|--|--|
| SPHK2  | STX1A   | TCIRG1   | TMEM2     | TSPAN1 | VAMP8  | WDR91    |  |  |
| SPINT2 | STX1B   | TCN2     | TMEM205   | TSPAN3 | VAPB   | WIPI1    |  |  |
| SPNS1  | STX2    | TDG      | TMEM237   | TSPAN6 | VASN   | WIPI2    |  |  |
| SPOCD1 | STX3    | TECPR1   | TMEM256   | TSPAN7 | VAT1   | WWP1     |  |  |
| SPON1  | STX4    | TECPR2   | TMEM50A   | TSP0   | VCP    | WWP2     |  |  |
| SPP2   | STX5    | TEX10    | TMEM50B   | TTC9B  | VDAC1  | XIRP2    |  |  |
| SPPL2A | STX6    | TF       | TMEM55A   | TTR    | VEPH1  | XPNPEP2  |  |  |
| SPTBN1 | STX7    | TFAP2A   | TMEM55B   | TTYH2  | VMA21  | XRCC6BP1 |  |  |
| SQRDL  | STX8    | TFE3     | TMEM59    | TTYH3  | VMP1   | YTHDF1   |  |  |
| SQSTM1 | STXBP1  | TFEB     | TMEM63A   | TUFM   | VNN1   | ZBTB8OS  |  |  |
| SRA1   | STXBP2  | TFEC     | TMEM63B   | TXNRD1 | VNN3   | ZC3H11A  |  |  |
| SRC    | STXBP3  | TFR2     | TMEM65    | TYR    | VPS11  | ZC3H18   |  |  |
| SRGAP1 | STXBP4  | TFRC     | TMEM74    | TYRP1  | VPS13C | ZCCHC8   |  |  |
| SRGN   | STXBP5  | TG       | TMEM8A    | U2AF1  | VPS16  | ZDHHC3   |  |  |
| SRL    | STXBP5L | TGFBR2   | TMEM9     | U2AF2  | VPS18  | ZFYVE16  |  |  |
| SRPX   | STXBP6  | TGFBR3   | TMEM92    | UBA52  | VPS25  | ZFYVE26  |  |  |
| SRRD   | SUB1    | TGFBRAP1 | TMOD2     | UBAP2  | VPS26A | ZFYVE9   |  |  |
| SSR1   | SULF2   | TGM2     | TMPRSS11B | UBAP2L | VPS28  | ZG16     |  |  |
| SSR3   | SULT1A1 | TGOLN2   | TMPRSS7   | UBB    | VPS29  | ZNF292   |  |  |
| ST14   | SULT1B1 | THAP8    | TMTC4     | UBE2B  | VPS33A | ZNF507   |  |  |

**Table S2. Sequencing primers for Sanger validation**

| Case    | Gene ID        | Chr | Position  | Forward Primer                   | Reverse Primer                   | length (bp) | length (bp)* |
|---------|----------------|-----|-----------|----------------------------------|----------------------------------|-------------|--------------|
| 00RD098 | <i>GLB1</i>    | 3   | 33099692  | TTCCCTGCTCTTTTTCACTCACAG         | CTGCAATTTCTGTTACTACAAACACC       | 235         |              |
| 00RD098 | <i>KRIT1</i>   | 7   | 91870373  | TACCTAGGGAACACTACTTCACA          | AAACTGTAAGAACCAGGCCCC            | 595         |              |
| 82RD265 | <i>SLC31A1</i> | 9   | 116021039 | <b>CAAGCAGTCTGACCAAAAGGT</b>     | CAGGCATGGAATTGTAGCGAA            | 385         | <b>2096</b>  |
| 82RD265 | <i>SLC31A1</i> | 9   | 116022721 | AAGTACCCATGAGTTGCCAGA            | <b>CTTCAACAACCTCCCACTGCA</b>     | 382         |              |
| 95RD414 | <i>GLA</i>     | X   | 100653420 | ATGGCTGCTCCTTTATTCATGT           | AAACCAAGAAAGTGTGGTTGCT           | 397         |              |
| 95RD414 | <i>SMPD1</i>   | 11  | 6413175   | TGACTGTGCAGACCCACTGT             | TGCTTTCATGGTTACCCACA             | 308         |              |
| CABMHF1 | <i>NPC1</i>    | 18  | 21136367  | TGATTCCTGCCATGAGATAGCAACT        | <b>CCCATCTAGCAGTAGTCAACATGTA</b> | 556         | <b>4415</b>  |
| CABMHF1 | <i>NPC1</i>    | 18  | 21140411  | <b>GTATTCAGTGGGCTTTTCTTTGAGT</b> | CATGGAGGTATTTGTTTCTTGTCTA        | 457         |              |
| CABMHF1 | <i>SMPD1</i>   | 11  | 6415259   | CACCATCCCTGTTGTCCCATGGAGT        | CACAGGGCTCCGAGGGTGGGT            | 713         |              |
| CABMHF3 | <i>TBCK</i>    | 4   | 107183332 | GAGGAGTATACTGGGACGCCA            | TAGGTTAGTTGCACTCACCACC           | 719         |              |

\* Bolded primers were used to amplify large fragments that contain both variants
